# Supplementary material for: Measurement of Endogenous versus Exogenous Formaldehyde–Induced DNA–Protein Crosslinks in Animal Tissues by Stable Isotope Labeling and Ultrasensitive Mass Spectrometry
Source: Oxford University Press journal article supplement (doi:10.1158/0008-5472.can-15-2527), 2016-03-17
Supplement: 00085472can152527-sup-155199_1_supp_0_g36b4g.docx [file 00085472can152527-sup-155199_1_supp_0_g36b4g.docx]

**Supplementary Table S1.** Method accuracy and precision

| Expected  (fmol) | Measured a  (fmol, mean ± SD) | Accuracy  (%) | Precision (RSD %) |
| --- | --- | --- | --- |
| 0.8 | 0.75 ± 0.09 (n=5) | 93.4 | 11.2 |
| 2.0 | 1.99 ± 0.14 (n=5) | 99.5 | 7.1 |
| 5.0 | 4.92 ± 0.28 (n=4) | 98.4 | 5.6 |

a Endogenous dG-Me-Cys has been subtracted from the data
