# Supplementary material for: Measurement of Endogenous versus Exogenous Formaldehyde–Induced DNA–Protein Crosslinks in Animal Tissues by Stable Isotope Labeling and Ultrasensitive Mass Spectrometry
Source: Oxford University Press journal article supplement (doi:10.1158/0008-5472.can-15-2527), 2016-03-17
Supplement: 00085472can152527-sup-155199_1_supp_0_t36b70.docx [file 00085472can152527-sup-155199_1_supp_0_t36b70.docx]

**Supplementary Table S4.** 6 ppm NHP Exposure Results

|  | Group 1 | Group 2 | Group 3 | Group 4 |
| --- | --- | --- | --- | --- |
| Number of animals | 2 | 2 | 2 | 2 |
| Day 1 | 6.5 ± 4.5 | 6.0 ± 3.1 | 6.2 ± 1.2 | 6.2 ± 0.7 |
| Day 2 | 6.0 ± 3.1 | 6.2 ± 1.2 | 6.1 ± 1.4 | 6.0 ± 0.7 |
| Average ± SD | 6.3 ± 3.9 | 6.2 ± 2.3 | 6.2 ± 1.3 | 6.1 ± 0.7 |

Group 1 and 2 animals were exposed in the same chamber on the same day (day 2 - group 1 and day 1 - group2) and group 2 and 3 animals were exposed in the same chamber on the same day (day 2 - group 2 and day 1 - group 3).
