# Supplementary material for: Measurement of Endogenous versus Exogenous Formaldehyde–Induced DNA–Protein Crosslinks in Animal Tissues by Stable Isotope Labeling and Ultrasensitive Mass Spectrometry
Source: Oxford University Press journal article supplement (doi:10.1158/0008-5472.can-15-2527), 2016-03-17
Supplement: 00085472can152527-sup-155199_1_supp_0_w36b5c.docx [file 00085472can152527-sup-155199_1_supp_0_w36b5c.docx]

**Supplementary Table S2.** 2 ppm Rat Exposure Results

| Targeted Exposure (ppm) | Exposures Days | Actual Chamber Concentration (ppm ± SD) |
| --- | --- | --- |
| 2 | 0-6 | 2.0 ± 0.2 |
| 2 | 0-27 | 2.0 ± 0.2 |
